# Supplementary material for: Isolation and Characterization of Nocardiae Associated with Foaming Coastal Marine Waters
Source: MDPI journal article supplement (doi:10.3390/pathogens10050579), 2021-05-10
Supplement: s1 [file s1]

Table S1. Details of the *Nocardia* isolates.

| Local Isolates/ID        | Closest Relative <sup>a</sup>                       | Percent Identity (%) | Phage Susceptibility <sup>b</sup> | Collection Location <sup>c</sup> | Month of Collection |
|--------------------------|-----------------------------------------------------|----------------------|-----------------------------------|----------------------------------|---------------------|
| USC-21006                | MH261196.1 <i>Nocardia nova</i> strain MGA115       | 98.44%               | –                                 | Mooloolaba                       | February            |
| USC-21010                | MH261196.1 <i>Nocardia nova</i> strain MGA115       | 99.78%               | –                                 | Mooloolaba                       | February            |
| USC-21011                | MH261196.1 <i>Nocardia nova</i> strain MGA115       | 99.70%               | –                                 | Mooloolaba                       | February            |
| USC-21012                | MH261196.1 <i>Nocardia nova</i> strain MGA115       | 99.71%               | –                                 | Mooloolaba                       | February            |
| USC-21016                | MH261196.1 <i>Nocardia nova</i> strain MGA115       | 99.71%               | –                                 | Cotton Tree                      | March               |
| USC-21017                | MH261196.1 <i>Nocardia nova</i> strain MGA115       | 98.43%               | –                                 | Cotton Tree                      | March               |
| USC-21018                | MH261196.1 <i>Nocardia nova</i> strain MGA115       | 99.57%               | ±                                 | Cotton Tree                      | March               |
| USC-21021                | KJ571085.1 <i>Nocardia grenadensis</i> strain T7-8  | 97.73%               | ++                                | Cotton Tree                      | March               |
| USC-21022                | MH261196.1 <i>Nocardia nova</i> strain MGA115       | 97.78%               | –                                 | Cotton Tree                      | March               |
| USC-21024<br>DSM 111829* | MH261196.1 <i>Nocardia nova</i> strain MGA115       | 98.97%               | –                                 | Mooloolaba                       | February            |
| USC-21025                | MH261196.1 <i>Nocardia nova</i> strain MGA115       | 99.42%               | –                                 | Mooloolaba                       | February            |
| USC-21026                | MH261196.1 <i>Nocardia nova</i> strain MGA115       | 99.71%               | –                                 | Mooloolaba                       | February            |
| USC-21027                | MH261196.1 <i>Nocardia nova</i> strain MGA115       | 99.78%               | –                                 | Mooloolaba                       | February            |
| USC-21028                | MH261196.1 <i>Nocardia nova</i> strain MGA115       | 99.63%               | –                                 | Mooloolaba                       | February            |
| USC-21029                | MH261196.1 <i>Nocardia nova</i> strain MGA115       | 99.06%               | –                                 | Mooloolaba                       | February            |
| USC-21030                | MH261196.1 <i>Nocardia nova</i> strain MGA115       | 98.21%               | –                                 | Cotton Tree                      | March               |
| USC-21032                | MH261196.1 <i>Nocardia nova</i> strain MGA115       | 98.49%               | –                                 | Cotton Tree                      | March               |
| USC-21034                | MH261196.1 <i>Nocardia nova</i> strain MGA115       | 98.97%               | –                                 | Mooloolaba                       | February            |
| USC-21035                | MH261196.1 <i>Nocardia nova</i> strain MGA115       | 99.56%               | –                                 | Mooloolaba                       | March               |
| USC-21036                | MH261196.1 <i>Nocardia nova</i> strain MGA115       | 99.64%               | –                                 | Mooloolaba                       | February            |
| USC-21037                | KY454539.1 <i>Nocardia testacea</i> strain F-161197 | 98.15%               | +++                               | Cotton Tree                      | March               |
| USC-21038                | MH261196.1 <i>Nocardia nova</i> strain MGA115       | 99.64%               | –                                 | Mooloolaba                       | February            |
| USC-21039<br>DSM 111830* | KM978823.1 <i>Nocardia higoensis</i> strain A6      | 97.01%               | –                                 | Mooloolaba                       | February            |
| USC-21040                | MH261196.1 <i>Nocardia nova</i> strain MGA115       | 97.14%               | –                                 | Mooloolaba                       | October             |

|                                 |                                                               |        |     |              |         |
|---------------------------------|---------------------------------------------------------------|--------|-----|--------------|---------|
| <b>USC-21042</b>                | NR_149226.1 <i>Nocardia rayongensis</i> strain RY45-3         | 96.79% | +++ | Maroochydore | October |
| <b>USC-21043</b>                | HM584914.1 <i>Nocardia nova</i> strain CBU 09/875             | 97.99% | –   | Maroochydore | October |
| <b>USC-21044</b><br>DSM 111630* | NR_117402<br><i>Nocardia niigatensis</i> strain W8186         | 97.84% | ++  | Maroochydore | October |
| <b>USC-21046</b><br>DSM 111727* | NR_109056.1 <i>Nocardia goodfellowii</i> strain A2012         | 93.03% | ++  | Maroochydore | October |
| <b>USC-21047</b>                | MK302233.1 <i>Nocardia tengchongensis</i> strain JBRI-MO-0018 | 97.19% | –   | Maroochydore | October |
| <b>USC-21048</b><br>DSM 111726* | NR_117320.1 <i>Nocardia elegans</i>                           | 96.50% | –   | Maroochydore | October |
| <b>USC-21049</b>                | MN620411.1 <i>Nocardia</i> sp. strain 19D1V24                 | 97.26% | –   | Maroochydore | October |
| <b>USC-21050</b>                | NR_117322.1 <i>Nocardia flavorosea</i>                        | 96.80% | –   | Maroochydore | October |

---

<sup>a</sup>Closest relative based on 16s rRNA gene sequence similarity. <sup>b</sup> +++: Highly susceptible (complete lysis), ++: Susceptible (complete partial lysis), +: Moderately susceptible (lysis and single plaques), ±: Low susceptibility (Lysis but regrowth of the host), –: Not susceptible. <sup>c</sup> Marine/beach locations situated on the Sunshine Coast, QLD, Australia. \*:Leibniz Institute DSMZ – German Collection of Micro-organisms and Cell Cultures (DSMZ) strain numbers for 5 deposited isolates which are publicly available.

Table S2. Antibiotic susceptibility testing results.

| ZONE DIAMETER (mm) /ANTIBIOTIC SUSCEPTIBILITY                                                                                                                                                                                                                                                                                                                                                                    |                                             |                                           |                                             |                                              |                                             |                                           |                                                     |                                                  |                                                                          |
|------------------------------------------------------------------------------------------------------------------------------------------------------------------------------------------------------------------------------------------------------------------------------------------------------------------------------------------------------------------------------------------------------------------|---------------------------------------------|-------------------------------------------|---------------------------------------------|----------------------------------------------|---------------------------------------------|-------------------------------------------|-----------------------------------------------------|--------------------------------------------------|--------------------------------------------------------------------------|
| *Interpretation threshold (mm) as described by Lebeaux, D., Bergeron, E., Berthet, J., Djadi-Prat, J., Mouniee, D., Boiron, P., Lortholary, O. and Rodriguez-Nava, V., 2019. Antibiotic susceptibility testing and species identification of <i>Nocardia</i> isolates: a retrospective analysis of data from a French expert laboratory, 2010–2015. <i>Clinical Microbiology and Infection</i> , 25(4), 489–495. |                                             |                                           |                                             |                                              |                                             |                                           |                                                     |                                                  |                                                                          |
| STRAIN ID                                                                                                                                                                                                                                                                                                                                                                                                        | Ampicillin<br>(10µg), ≥21<br>(S)*, <16 (R)* | Imipemen<br>(10µg), ≥24<br>(S)*, <17 (R)* | Cefotaxime<br>(30µg), ≥26<br>(S)*, <23 (R)* | Ceftriaxone<br>(30µg), ≥26<br>(S)*, <23 (R)* | Tobramycin<br>(10µg), ≥18<br>(S)*, <16 (R)* | Amikacin<br>(30µg), ≥17<br>(S)*, <15 (R)* | Minocycline<br>(30µg), (30IU,<br>≥26 (S)*, <23 (R)* | Erythromycin (15µg),<br>15IU, ≥22 (S)*, <17 (R)* | Trimethoprim/sul<br>phamethoxazole (1.25/23.75 µg) ≥16<br>(S)*, <10 (R)* |
| USC-21006                                                                                                                                                                                                                                                                                                                                                                                                        | 28 (S)                                      | 60 (S)                                    | 0 (R)                                       | 10 (R)                                       | 12 (R)                                      | 58 (S)                                    | 30 (S)                                              | 40 (S)                                           | 20 (S)                                                                   |
| USC-21010                                                                                                                                                                                                                                                                                                                                                                                                        | 34 (S)                                      | 68 (S)                                    | 0 (R)                                       | 0 (R)                                        | 12 (R)                                      | 60 (S)                                    | 0 (R)                                               | 44 (S)                                           | 0 (R)¥                                                                   |
| USC-21011                                                                                                                                                                                                                                                                                                                                                                                                        | 30 (S)                                      | 60 (S)                                    | 0 (R)                                       | 10 (R)                                       | 14 (R)                                      | 60 (S)                                    | 52 (S)                                              | 48 (S)                                           | 0 (R)¥                                                                   |
| USC-21012                                                                                                                                                                                                                                                                                                                                                                                                        | 32 (S)                                      | 60 (S)                                    | 0 (R)                                       | 12 (R)                                       | 14 (R)                                      | 50 (S)                                    | 42 (S)                                              | 42 (S)                                           | 0 (R)¥                                                                   |
| USC-21016                                                                                                                                                                                                                                                                                                                                                                                                        | 22 (S)                                      | 56 (S)                                    | 0 (R)                                       | 0 (R)                                        | 10 (R)                                      | 40 (S)                                    | 22 (S)                                              | 46 (S)                                           | 28 (S)                                                                   |
| USC-21017                                                                                                                                                                                                                                                                                                                                                                                                        | 26 (S)                                      | 56 (S)                                    | 8 (R)                                       | 0 (R)                                        | 17 (I)                                      | 54 (S)                                    | 30 (S)                                              | 44 (S)                                           | 40 (S)                                                                   |
| USC-21018                                                                                                                                                                                                                                                                                                                                                                                                        | 36 (S)                                      | 54 (S)                                    | 16 (R)                                      | 0 (R)                                        | 10 (R)                                      | 24 (S)                                    | 32 (S)                                              | 42 (S)                                           | 30 (S)                                                                   |
| USC-21021                                                                                                                                                                                                                                                                                                                                                                                                        | 30 (S)                                      | 42 (S)                                    | 34 (S)                                      | 38 (S)                                       | 44 (S)                                      | 44 (S)                                    | 46 (S)                                              | 20 (I)                                           | 50 (S)                                                                   |
| USC-21022                                                                                                                                                                                                                                                                                                                                                                                                        | 24 (S)                                      | 54 (S)                                    | 0 (R)                                       | 0 (R)                                        | 14 (R)                                      | 39 (S)                                    | 34 (S)                                              | 40 (S)                                           | 36 (S)                                                                   |
| USC-21024                                                                                                                                                                                                                                                                                                                                                                                                        | 32 (S)                                      | 60 (S)                                    | 0 (R)                                       | 0 (R)                                        | 16 (I)                                      | 62 (S)                                    | 50 (S)                                              | 40 (S)                                           | 0 (R)¥                                                                   |
| USC-21025                                                                                                                                                                                                                                                                                                                                                                                                        | 28 (S)                                      | 60 (S)                                    | 0 (R)                                       | 0 (R)                                        | 0 (R)                                       | 66 (S)                                    | 30 (S)                                              | 40 (S)                                           | 0 (R)¥                                                                   |
| USC-21026                                                                                                                                                                                                                                                                                                                                                                                                        | 14 (R)                                      | 52 (S)                                    | 0 (R)                                       | 0 (R)                                        | 0 (R)                                       | 58 (S)                                    | 26 (S)                                              | 46 (S)                                           | 0 (R)¥                                                                   |
| USC-21027                                                                                                                                                                                                                                                                                                                                                                                                        | 32 (S)                                      | 62 (S)                                    | 0 (R)                                       | 0 (R)                                        | 8 (R)                                       | 60 (S)                                    | 30 (S)                                              | 44 (S)                                           | 0 (R)¥                                                                   |
| USC-21028                                                                                                                                                                                                                                                                                                                                                                                                        | 20 (I)                                      | 52 (S)                                    | 0 (R)                                       | 0 (R)                                        | 10 (R)                                      | 58 (S)                                    | 28 (S)                                              | 46 (S)                                           | 0 (R)¥                                                                   |
| USC-21029                                                                                                                                                                                                                                                                                                                                                                                                        | 20 (I)                                      | 64 (S)                                    | 0 (R)                                       | 12 (R)                                       | 10 (R)                                      | 56 (S)                                    | 24 (I)                                              | 50 (S)                                           | 0 (R)¥                                                                   |
| USC-21030                                                                                                                                                                                                                                                                                                                                                                                                        | 34 (S)                                      | 68 (S)                                    | 0 (R)                                       | 50 (S)                                       | 8 (R)                                       | 42 (S)                                    | 26 (S)                                              | 48 (S)                                           | 0 (R)¥                                                                   |
| USC-21032                                                                                                                                                                                                                                                                                                                                                                                                        | 20 (I)                                      | 64 (S)                                    | 0 (R)                                       | 20 (R)                                       | 12 (R)                                      | 50 (S)                                    | 30 (S)                                              | 40 (S)                                           | 20 (S)                                                                   |
| USC-21034                                                                                                                                                                                                                                                                                                                                                                                                        | 16 (I)                                      | 56 (S)                                    | 0 (R)                                       | 0 (R)                                        | 14 (R)                                      | 48 (S)                                    | 30 (S)                                              | 28 (S)                                           | 0 (R)¥                                                                   |
| USC-21035                                                                                                                                                                                                                                                                                                                                                                                                        | 30 (S)                                      | 70 (S)                                    | 0 (R)                                       | 0 (R)                                        | 14 (R)                                      | 50 (S)                                    | 36 (S)                                              | 52 (S)                                           | 0 (R)¥                                                                   |
| USC-21036                                                                                                                                                                                                                                                                                                                                                                                                        | 16 (I)                                      | 42 (S)                                    | 0 (R)                                       | 0 (R)                                        | 34 (S)                                      | 32 (S)                                    | 36 (S)                                              | 44 (S)                                           | 40 (S)                                                                   |

|                  |        |        |        |        |        |        |        |        |        |
|------------------|--------|--------|--------|--------|--------|--------|--------|--------|--------|
| <b>USC-21037</b> | 28 (S) | 50 (S) | 36 (S) | 32 (S) | 60 (S) | 60 (S) | 30 (S) | 10 (R) | 60 (S) |
| <b>USC-21038</b> | 26 (S) | 60 (S) | 0 (R)  | 0 (R)  | 8 (R)  | 52 (S) | 32 (S) | 46 (S) | 0 (R)¥ |
| <b>USC-21039</b> | 32 (S) | 42 (S) | 22 (R) | 30 (S) | 32 (S) | 40 (S) | 42 (S) | 16 (R) | 42 (S) |
| <b>USC-21040</b> | 24 (S) | 42 (S) | 0 (R)  | 20 (R) | 14 (R) | 40 (S) | 20 (R) | 50 (S) | 30 (S) |
| <b>USC-21042</b> | 62 (S) | 64 (S) | 40 (S) | 39 (S) | 62 (S) | 70 (S) | 60 (S) | 50 (S) | 30 (S) |
| <b>USC-21043</b> | 10 (R) | 48 (S) | 0 (R)  | 0 (R)  | 0 (R)  | 60 (S) | 30 (S) | 40 (S) | 0 (R)¥ |
| <b>USC-21044</b> | 0 (R)  | 0 (R)  | 0 (R)  | 0 (R)  | 38 (S) | 40 (S) | 30 (S) | 24 (S) | 34 (S) |
| <b>USC-21046</b> | 24 (S) | 42 (S) | 30 (S) | 32 (S) | 50 (S) | 48 (S) | 40 (S) | 48 (S) | 40 (S) |
| <b>USC-21047</b> | 0 (R)  | 0 (R)  | 0 (R)  | 0 (R)  | 40 (S) | 38 (S) | 38 (S) | 40 (S) | 38 (S) |
| <b>USC-21048</b> | 24 (S) | 56 (S) | 10 (R) | 26 (S) | 40 (S) | 50 (S) | 40 (S) | 28 (S) | 0 (R)¥ |
| <b>USC-21049</b> | 20 (I) | 64 (S) | 0 (R)  | 0 (R)  | 14 (R) | 44 (S) | 30 (S) | 34 (S) | 0 (R)¥ |
| <b>USC-21050</b> | 14 (R) | 46 (S) | 32 (S) | 39 (S) | 34 (S) | 56 (S) | 48 (S) | 24 (S) | 44 (S) |

S, susceptible. I, Intermediate. R, resistant. Footnote: S, susceptible. I, Intermediate. R, resistant, ¥: inhibition zone is <10mm for Trimethoprim/sulphamethoxazole (1.25/23.75 µg) and an E-test strip is required to be subsequently performed as per Lebeaux, D., Bergeron, E., Berthet, J., Djadi-Prat, J., Mouniee, D., Boiron, P., Lortholary, O. and Rodriguez-Nava, V., 2019. Antibiotic susceptibility testing and species identification of *Nocardia* isolates: a retrospective analysis of data from a French expert laboratory, 2010–2015. *Clinical Microbiology and Infection*, 25(4), 489–495.).

**Table S3.** Differences in the adhesion capability of the 32 *Nocardia* isolates and control strains (HMLN-1 and 73-89) evaluated by microscopic method.

| Isolates & Strains | Average No. of Adhering Bacteria/Cell <sup>a</sup> | Average No. of Adhering Bacteria /Cell <sup>a</sup> | Percentages of Cells Showing Adhering Bacteria <sup>b</sup> | Adherence Pattern Phenotype <sup>c</sup> |
|--------------------|----------------------------------------------------|-----------------------------------------------------|-------------------------------------------------------------|------------------------------------------|
| USC-21006          | 4.3 ± 0.3                                          | 4.3 ± 2.9                                           | 22.0                                                        | DA                                       |
| USC-21010          | 1.4 ± 0.4                                          | 1.4 ± 3.4                                           | 5.0                                                         | DA                                       |
| USC-21011          | 0.1 ± 0.0                                          | 0.1 ± 0.4                                           | 0.7                                                         | DA                                       |
| USC-21012          | 0.1 ± 0.0                                          | 0.1 ± 0.3                                           | 0.7                                                         | DA                                       |
| USC-21016          | 0.2 ± 0.1                                          | 0.2 ± 0.7                                           | 1.3                                                         | DA                                       |
| USC-21017          | 4.3 ± 0.8                                          | 4.3 ± 7.2                                           | 9.3                                                         | DA                                       |
| USC-21018          | 3.4 ± 0.4                                          | 3.4 ± 3.7                                           | 15.0                                                        | DA                                       |
| USC-21021          | 5.3 ± 0.6                                          | 5.3 ± 5.6                                           | 15.3                                                        | DA                                       |
| USC-21022          | 0.3 ± 0.1                                          | 0.3 ± 0.9                                           | 2.3                                                         | DA                                       |
| USC-21024          | 0.1 ± 0.1                                          | 0.1 ± 0.6                                           | 0.3                                                         | DA                                       |
| USC-21025          | 10.8 ± 0.8                                         | 10.8 ± 6.5                                          | 31.0                                                        | LA                                       |
| USC-21026          | 0.5 ± 0.1                                          | 0.5 ± 1.2                                           | 4.3                                                         | DA                                       |
| USC-21027          | 0.5 ± 0.1                                          | 0.5 ± 1.1                                           | 5.3                                                         | DA                                       |
| USC-21028          | 1.3 ± 0.3                                          | 1.3 ± 3.0                                           | 5.3                                                         | DA                                       |
| USC-21029          | 0.7 ± 0.2                                          | 0.7 ± 1.6                                           | 4.7                                                         | DA                                       |
| USC-21030          | 8.9 ± 0.5                                          | 8.9 ± 4.0                                           | 52.7                                                        | DA                                       |
| USC-21032          | 0.3 ± 0.1                                          | 0.3 ± 0.8                                           | 3.3                                                         | DA                                       |
| USC-21034          | 15.5 ± 0.8                                         | 15.5 ± 6.6                                          | 99.3                                                        | DA                                       |
| USC-21035          | 20.0 ± 0.1                                         | 20.0 ± 0.9                                          | 60.7                                                        | DA                                       |
| USC-21036          | 6.5 ± 0.8                                          | 6.5 ± 6.6                                           | 16.3                                                        | LA                                       |
| USC-21037          | 0.1 ± 0.1                                          | 0.1 ± 0.5                                           | 1.7                                                         | DA                                       |
| USC-21038          | 16.5 ± 1.0                                         | 16.5 ± 9.0                                          | 21.7                                                        | DA                                       |
| USC-21039          | 4.6 ± 0.5                                          | 4.6 ± 4.2                                           | 18.0                                                        | DA                                       |
| USC-21040          | 0.3 ± 0.1                                          | 0.3 ± 1.1                                           | 1.7                                                         | DA                                       |
| USC-21042          | 5.4 ± 0.6                                          | 5.4 ± 5.5                                           | 16.7                                                        | DA                                       |
| USC-21043          | 0.2 ± 0.1                                          | 0.2 ± 0.8                                           | 1.3                                                         | DA                                       |
| USC-21044          | 16.9 ± 0.7                                         | 16.9 ± 6.2                                          | 88.7                                                        | DA                                       |
| USC-21046          | 4.7 ± 0.6                                          | 4.7 ± 5.0                                           | 15.0                                                        | DA                                       |
| USC-21047          | 0.5 ± 0.2                                          | 0.5 ± 1.3                                           | 4.7                                                         | DA                                       |
| USC-21048          | 5.0 ± 0.6                                          | 5.0 ± 5.3                                           | 16.0                                                        | DA                                       |
| USC-21049          | 16.5 ± 1.0                                         | 16.5 ± 9.0                                          | 94.7                                                        | DA                                       |
| USC-21050          | 19.4 ± 0.9                                         | 19.4 ± 7.7                                          | 98.3                                                        | DA                                       |
| HMLN-1             | 21.8 ± 0.6                                         | 21.8 ± 5.1                                          | 90.0                                                        | DA                                       |
| 73-89              | 21.0 ± 0.4                                         | 21.0 ± 3.4                                          | 85.7                                                        | DA                                       |

Data shown are from triplicate experiments. Difference in the degrees of adhesion was found to be significant ( $P < 0.0001$ ). <sup>a</sup>Bacterial adhesion determined by enumerating the number of bacterial cells per 25 randomly selected Calu-3 cells in triplicates. <sup>b</sup>Mean Percentage calculated by identifying bacterial cells displaying adherence to 100 randomly selected Calu-3 cells. <sup>c</sup>DA: diffuse; LA: Localized.

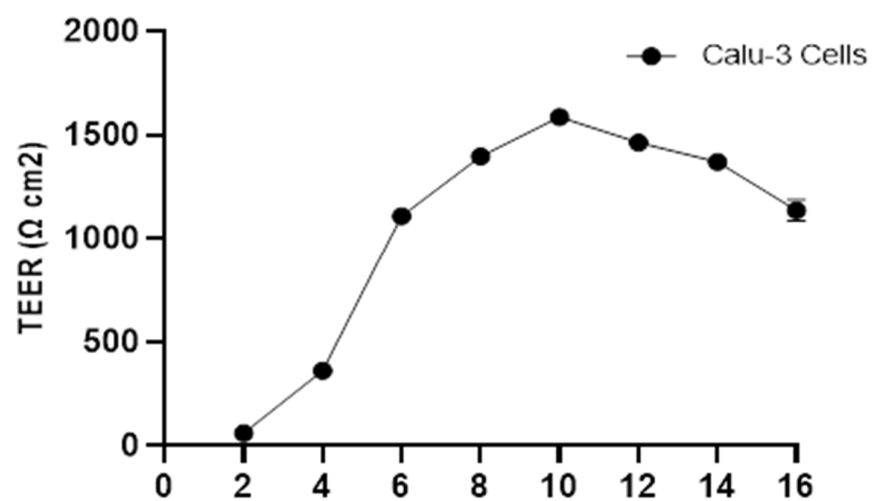

**Figure S1.** Change in TEER values of calu-3 cells following 16 days post seeding. Data shown are from triplicate experiments and plotted as the mean  $\pm$  SEM. Maximum TEER value (1588  $\Omega$  cm<sup>2</sup>) obtained on day 10 post seeding.
